# Supplementary material
Source: PubMed Central journal article supplement (PMC3472004)

ESI 1 Simulation results for velocity distribution at Re=5.6, 11.2 and 16.8, respectively

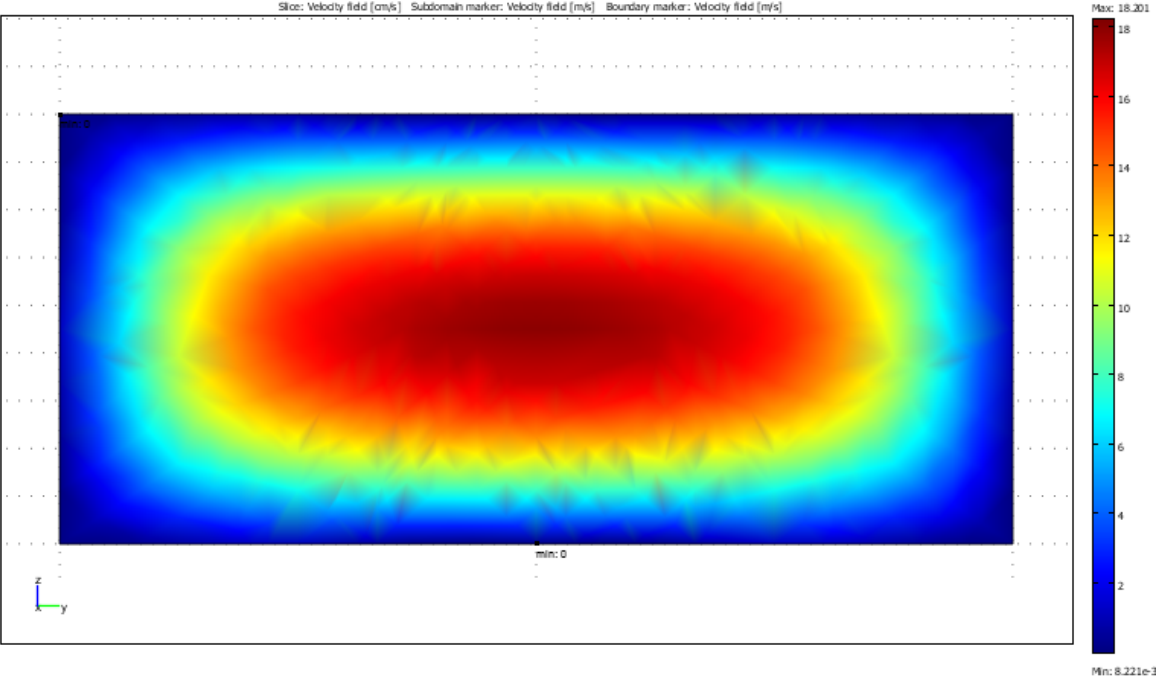

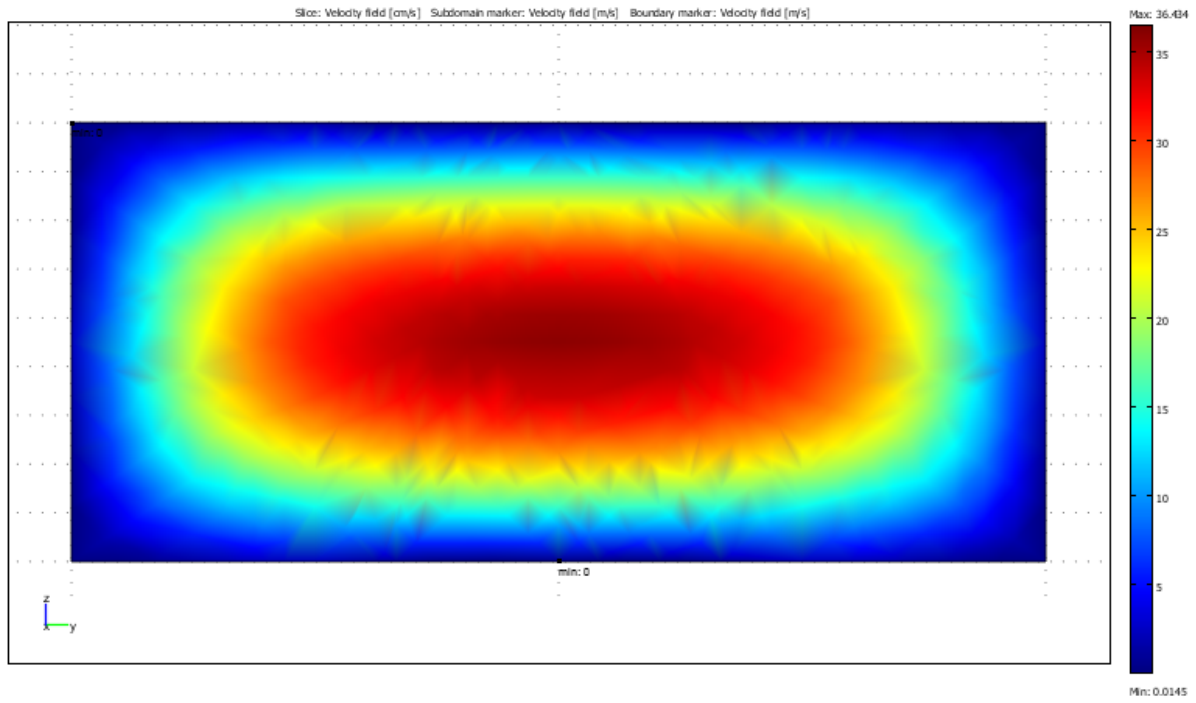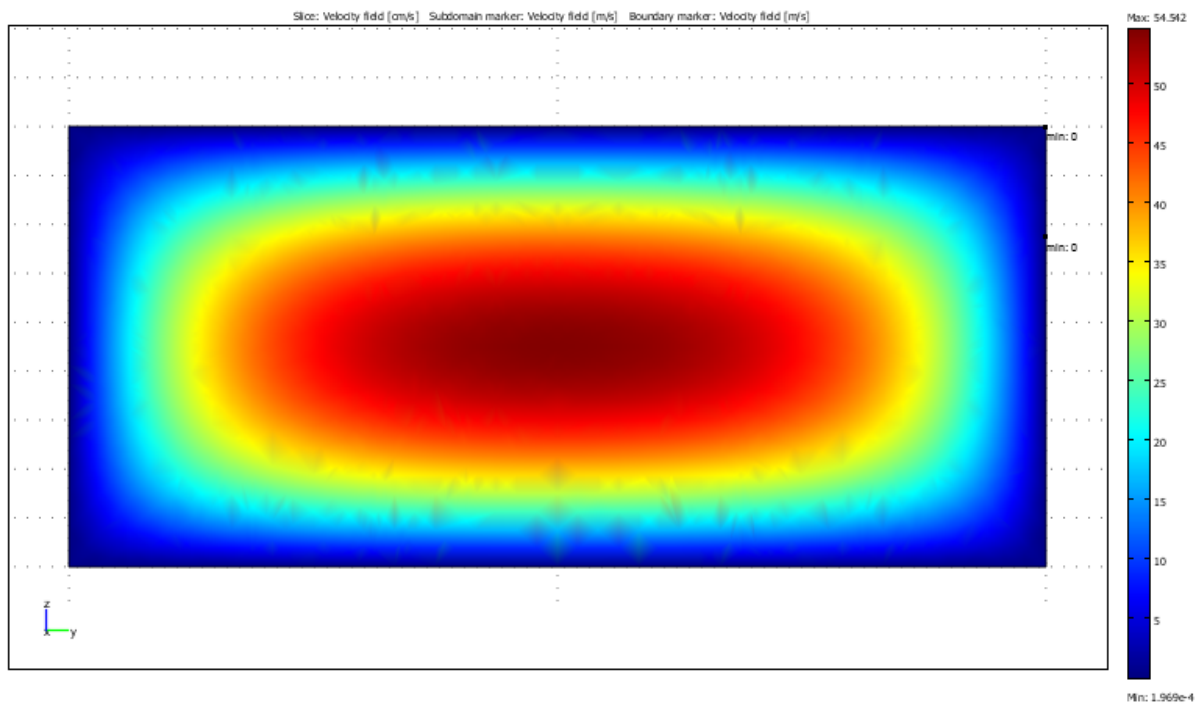

Supplement: NIHMS404650-supplement-esi.pdf [file NIHMS404650-supplement-esi.pdf]
